# Supplementary material for: Prestin amplifies cardiac motor functions
Source: PubMed Central journal article supplement — Cell Rep. Author manuscript; Available in PMC 2022 Jan 2. (PMC8720583; doi:10.1016/j.celrep.2021.109097), 2021-05-04
Supplement: NIHMS1764571-supplement-1.pdf [file NIHMS1764571-supplement-1.pdf]

Cell Reports, Volume 35

## Supplemental information

### **Prestin amplifies cardiac motor functions**

**Xiao-Dong Zhang, Phung N. Thai, Lu Ren, Maria Cristina Perez Flores, Hannah A. Ledford, Seojin Park, Jeong Han Lee, Choong-Ryoul Sihm, Che-Wei Chang, Wei Chun Chen, Valeriy Timofeyev, Jian Zuo, James W. Chan, Ebenezer N. Yamoah, and Nipavan Chiamvimonvat**

## Supplementary Information

### Prestin amplifies cardiac motor functions

Authors: Xiao-Dong Zhang<sup>1,2\*†</sup>, Phung N. Thai<sup>1</sup>, Lu Ren<sup>1</sup>, Maria Cristina Perez Flores<sup>3</sup>, Hannah A. Ledford<sup>1</sup>, Seojin Park<sup>3</sup>, Jeong Han Lee<sup>3</sup>, Choong-Ryoul Sihn<sup>1</sup>, Che-Wei Chang<sup>4</sup>, Wei Chun Chen<sup>1</sup>, Valeriy Timofeyev<sup>1</sup>, Jian Zuo<sup>5</sup>, James W. Chan<sup>4</sup>, Ebenezer N. Yamoah<sup>3\*‡</sup>, and Nipavan Chiamvimonvat<sup>1,2\*†</sup>

#### Affiliations:

<sup>1</sup>Division of Cardiovascular Medicine, University of California, Davis, Davis, CA 95616, USA.

<sup>2</sup>Department of Veterans Affairs, Northern California Health Care System, Mather, CA 95655, USA.

<sup>3</sup>Department of Physiology and Cell Biology, University of Nevada, Reno School of Medicine, Reno, NV 89557, USA.

<sup>4</sup>Department of Pathology and Laboratory Medicine, University of California, Davis, Davis, CA 95817, USA.

<sup>5</sup>Department of Biomedical Sciences, Creighton University, Omaha, NE 68178, USA.

\*Correspondence to [nchiamvimonvat@ucdavis.edu](mailto:nchiamvimonvat@ucdavis.edu) (NC), [xdzhang@ucdavis.edu](mailto:xdzhang@ucdavis.edu) (X-D.Z.), [enyamoah@gmail.com](mailto:enyamoah@gmail.com) (ENY.)

†Nipavan Chiamvimonvat and Xiao-Dong Zhang  
Division of Cardiovascular Medicine  
Department of Internal Medicine  
University of California, Davis  
One Shields Avenue, GBSF 6303  
Davis, CA 95616  
& Department of Veterans Affairs  
Northern California Health Care System  
10535 Hospital Way  
Mather, CA 95655

‡Ebenezer N. Yamoah  
Department of Physiology and Cell Biology  
University of Nevada, Reno School of Medicine  
1664 North Virginia Street  
Reno, NV 89557

## Figures S1-S5

**Figure S1**

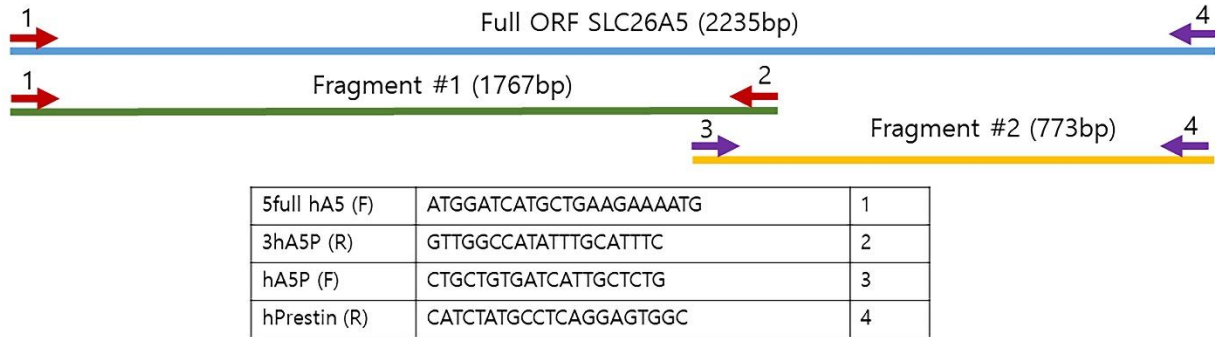

**Fig. S1. The strategy and cloning of human cardiac prestin (~2.2 kb). Related to STAR Methods and METHOD DETAILS.** For amplifying the full-length coding sequence of human cardiac *SLC26A5*, fragments 1 (1767 bp) and 2 (773 bp) were first amplified using two separate sets of primers.

**Figure S2**

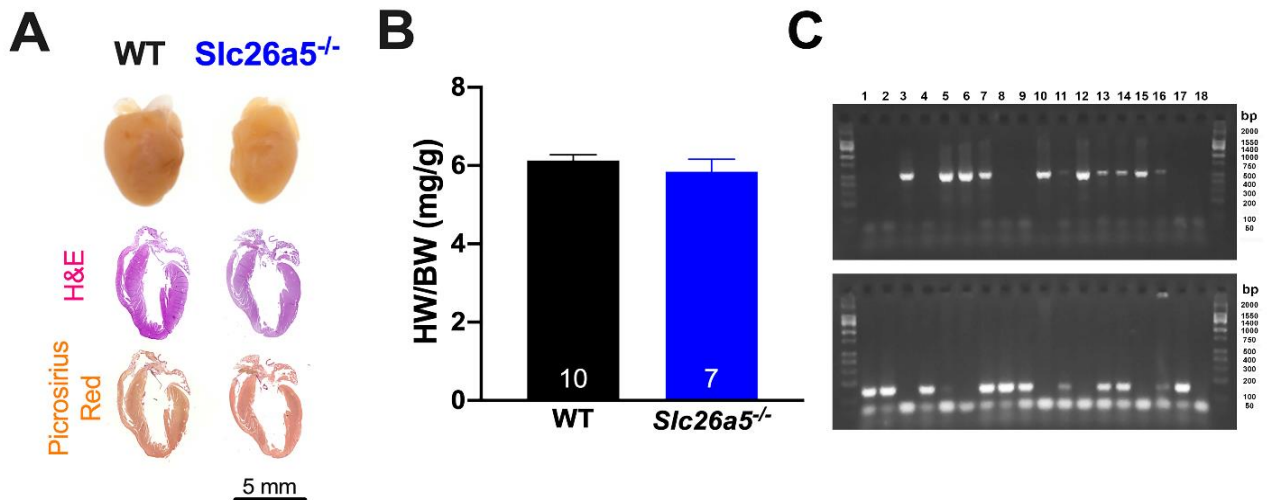

**Fig. S2. Characterization and genotype analyses of *Slc26a5*<sup>-/-</sup> mice. Related to Figure 1, STAR Methods, and METHOD DETAILS.** (A) Photomicrographs of the whole heart of WT and *Slc26a5*<sup>-/-</sup> mice together with histological staining using H&E and Picrosirius Red, demonstrating no evidence of fibrosis in the knockout mice (scale bar, 5 mm). (B) Summary data for heart/body weight ratio in mg/g. (C) Photomicrographs of agarose gel from genotype analyses using primers to amplify the mutant and WT bands shown in the upper and lower panels, respectively. The leftmost and rightmost lanes are All-Purpose LO<sup>TM</sup> DNA Marker 50-2000 bp (Bionexus). Lanes 1-14 is PCR products amplified from genomic DNA samples from 2 different

litters. Lanes 15, 16, and 17 are control samples from mutant, heterozygous, and WT mice, respectively. Lane 18 is a no template control. The PCR products' expected sizes are 500 and 175 bp for mutant and WT bands, respectively.

### Figure S3

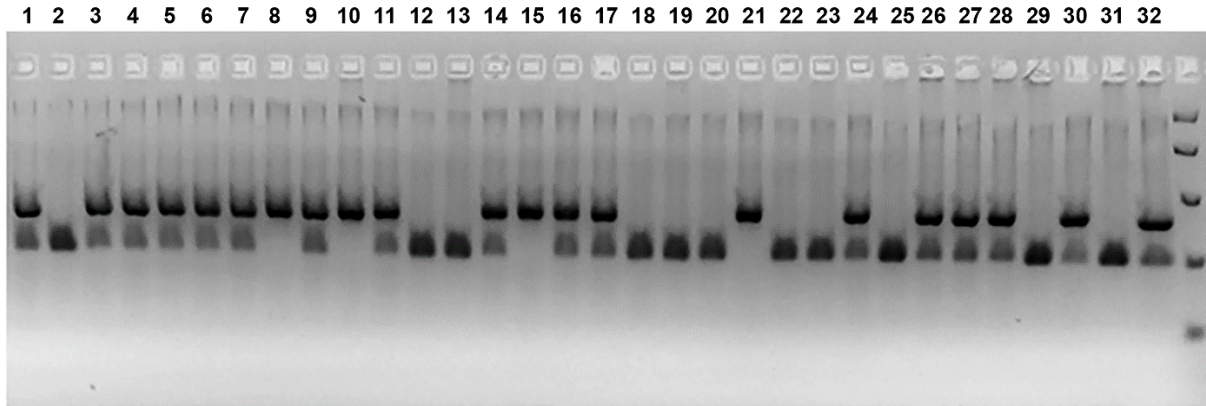

**Fig. S3. Photomicrographs of agarose gel from genotype analyses using primers to amplify the mutant and WT bands for *Prestin-YFP* knockin mice. Related to Figure 2, STAR Methods, and METHOD DETAILS.** The rightmost lane is LMW DNA Ladder. Lanes 2, 12, 13, 18, 19, 20, 22, 23, 25, 29, and 31 are PCR products amplified from genomic DNA samples from WT mice. Lanes 8, 10, 15, and 21 are PCR products amplified from genomic DNA samples from *Prestin-YFP* knockin mice. The rest of the lanes are from heterozygous knockin mice. The PCR products' expected sizes are 387 and 247 bp for mutant and WT bands, respectively.

Figure S4

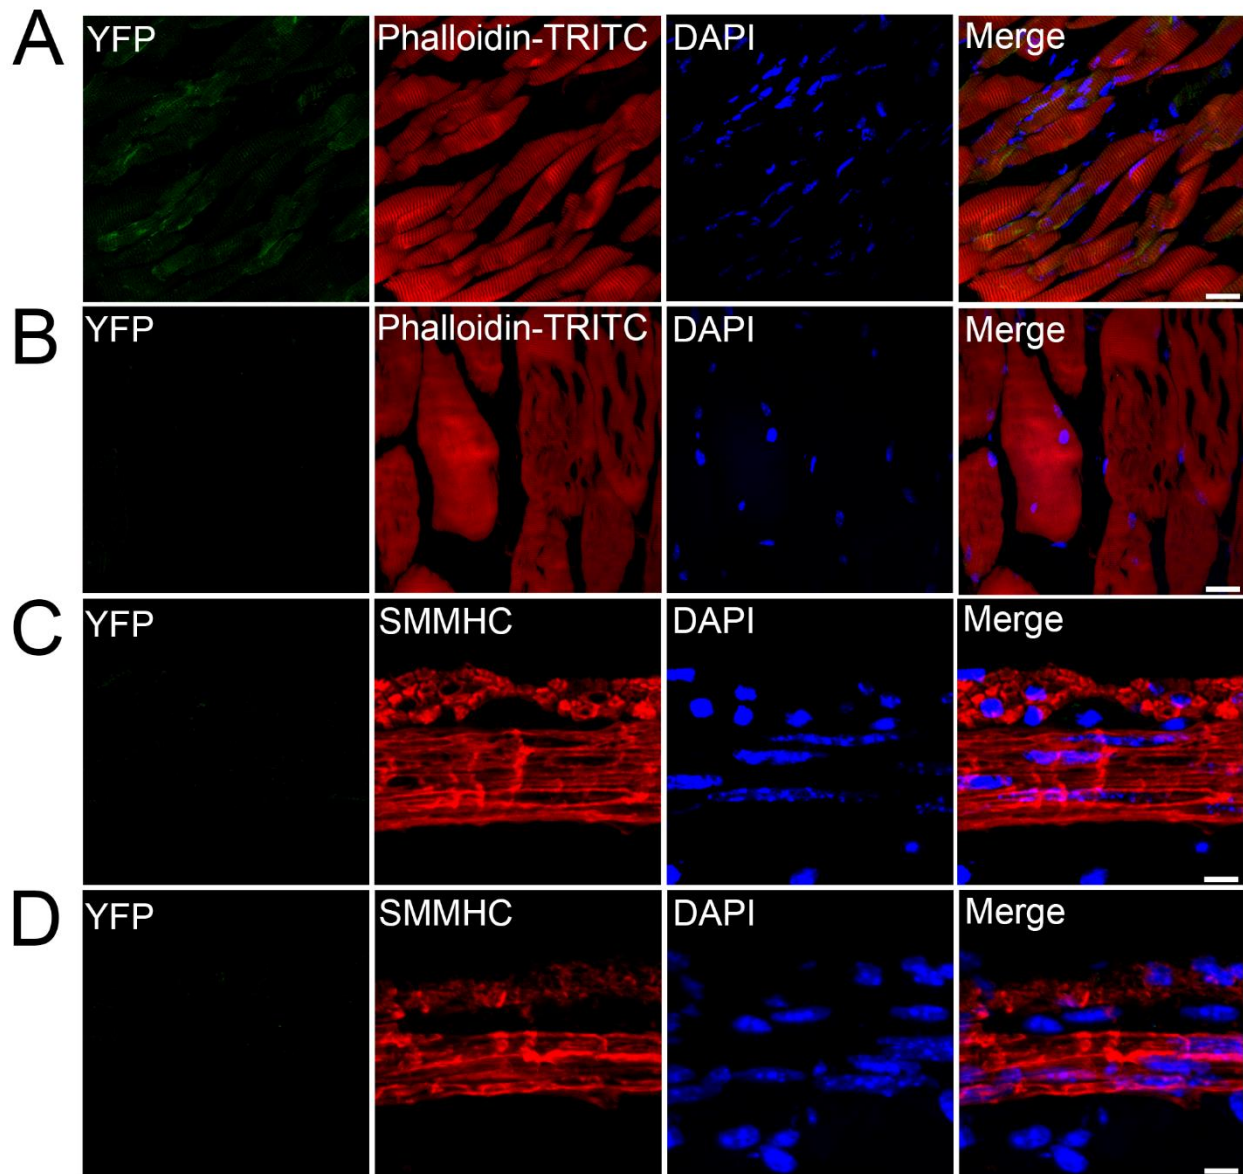

**Fig. S4. Expression of prestin in skeletal muscle tissues from Prestin-YFP KI mice. Related to Figure 2.** (A) Expression of prestin-YFP in skeletal muscles. Phalloidin-TRITC stained skeletal muscles. Scale bar: 30  $\mu\text{m}$ . (B) YFP signals were not detected in control skeletal muscles from WT mice. Scale bar: 30  $\mu\text{m}$ . (C) The prestin-YFP signals in gut smooth muscles are not detected. The gut smooth muscles were labeled by the anti-smooth muscle myosin heavy chain 11(SMMHC). Scale bar: 7  $\mu\text{m}$ . (D) YFP signals were not detected in control gut smooth muscles from WT mice. Scale bar: 7  $\mu\text{m}$ .

Figure S5

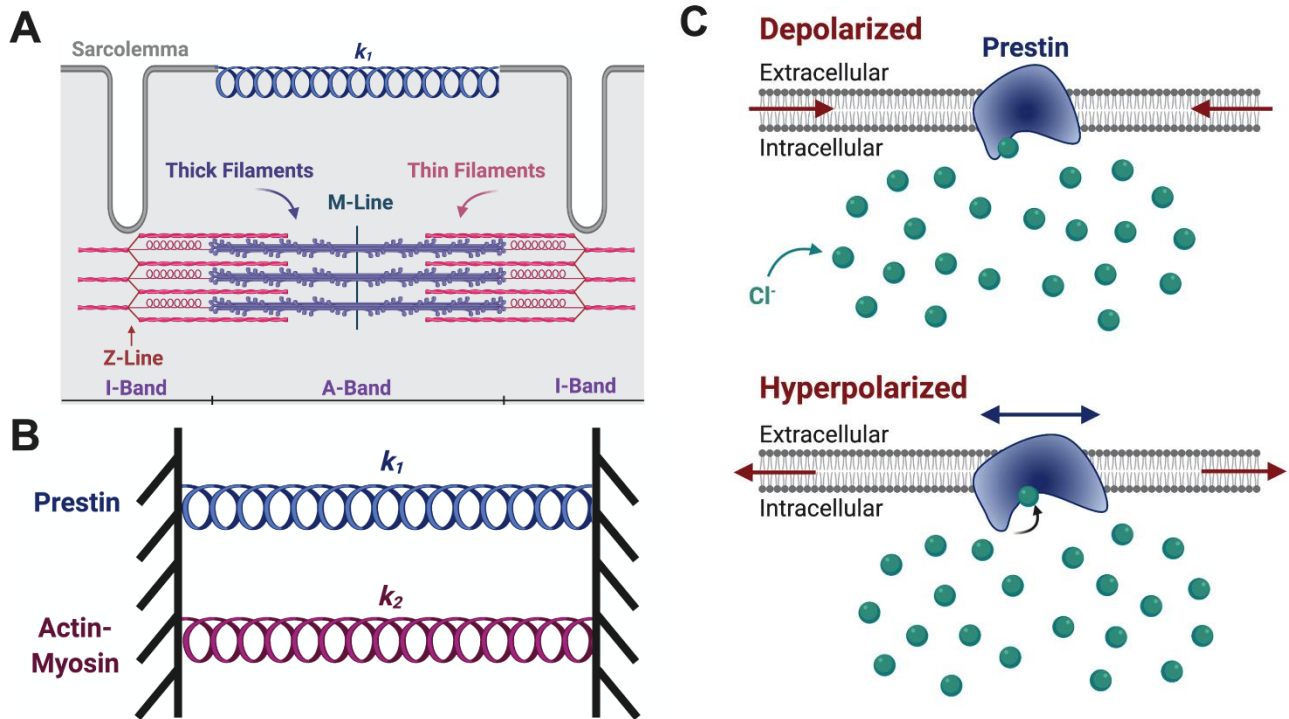

**Fig. S5. A conceptual model of prestin function in cardiomyocytes. Related to Figure 2 and Figure 5.** (A) Schematic diagram of a cardiac sarcomere with the added parallel spring. The schematic depicts the thick (myosin) and thin filaments (actin) with Z line, M line, A band, and I band indicated. (B) Prestin serves as a spring in parallel to the actin-myosin with a spring constant of the assembly of  $k = k_1$  (prestins) +  $k_2$  (actin-myosin). (C) A conceptual model of prestin in cardiomyocytes. During membrane depolarization, intracellular anion  $\text{Cl}^-$  increases and binds to the cytoplasmic face of the prestin molecule. Prestin is expected to assume a contracted conformation (short conformation). When the membrane hyperpolarizes, intracellular  $\text{Cl}^-$  is translocated across the protein towards the external side, and prestin is expected to assume an expanded conformation (long conformation). We speculate that prestin may co-localize with  $\text{Cl}^-$  channels or transporters, generating a local  $\text{Cl}^-$  microdomain necessary for providing the  $\text{Cl}^-$  to prestin function. Images were generated using BioRender.
